# Supplementary material for: Good performance of the criteria of American College of Medical Genetics and Genomics/Association for Molecular Pathology in prediction of pathogenicity of genetic variants causing thoracic aortic aneurysms and dissections
Source: Springer Nature journal article supplement (doi:10.1186/s12967-022-03251-8), 2022-01-25
Supplement: MOESM1 [file 20067618]

Table S1. List of variants identified in TAAD patients.

| No | Gene   | hg38 position               | Transcript position                   | Protein                              | Effect                  | ACMG Version: 9.1.2    | ClinVar                                              | ClinVar mean           | Allele frequency gnomad genomes | Allele frequency gnomad exomes |
|----|--------|-----------------------------|---------------------------------------|--------------------------------------|-------------------------|------------------------|------------------------------------------------------|------------------------|---------------------------------|--------------------------------|
| 1  | FBN1   | 15:048516225-G>A            | NM_000138.4:c.1285C>T                 | NP_000129.3:p.Arg429Ter              | stop_gained             | Pathogenic             | Pathogenic                                           | P/LP                   | 0                               | 0                              |
| 2  | TGFBR1 | 9:099142664-G>A             | NM_004612.4:c.934G>A                  | NP_004603.1:p.Gly312Ser              | missense_variant        | Pathogenic             | Pathogenic/Likely pathogenic                         | P/LP                   | 0.0000070                       | 0.0000041                      |
| 3  | FBN1   | 15:048613054-C>T            | NM_000138.4:c.203G>A                  | NP_000129.3:p.Cys68Tyr               | missense_variant        | Pathogenic             | Pathogenic/Likely pathogenic                         | P/LP                   | 0                               | 0                              |
|    | MYLK   | 3:123701493-A>G             | NM_053025.3:c.2407T>C                 | NP_444253.3:p.Cys803Arg              | missense_variant        | Uncertain Significance | Uncertain significance                               | Uncertain significance | 0.0000209                       | 0.0000081                      |
| 4  | ELN    | 7:074057441-G>A             | NM_000501.4:c.1358-199G>A             |                                      | missense_variant        | Benign                 | Uncertain significance                               | Uncertain significance | 0.0003281                       | 0.0001350                      |
| 5  | FBN1   | 15:048441799-A>G            | NM_000138.4:c.6085T>C                 | NP_000129.3:p.Cys2029Arg             | missense_variant        | Likely Pathogenic      | No record                                            | No record              | 0                               | 0                              |
| 6  | TGFB2  | 1:218363420-G>A             | NM_003238.5:c.346+16373G>A            |                                      | splice_region_variant   | Uncertain Significance | No record                                            | No record              | 0                               | 0                              |
| 7  | MYH11  | 16:015740155-C>A            | NM_002474.3:c.2893G>T                 | NP_002465.1:p.Ala965Ser              | missense_variant        | Benign                 | Likely benign/Uncertain significance                 | Uncertain significance | 0.0003000                       | 0.0003533                      |
| 8  | SMAD3  | 15:067165385-G>T            | NM_005902.4:c.532+1G>T                |                                      | splice_donor_variant    | Pathogenic             | No record                                            | No record              | 0                               | 0                              |
| 9  | FBN1   | 15:048508698-TCCATATCTG>T   | NM_000138.4:c.1715-3_1720delCAGATATGG | NP_000129.3:p.Asp572_Cys576delinsGly | inframe_deletion        | Likely Pathogenic      | No record                                            | No record              | 0                               | 0                              |
|    | ELN    | 7:074042986-G>A             | NM_000501.4:c.328G>A                  | NP_000492.2:p.Ala110Thr              | missense_variant        | Benign                 | Benign(1);Likely benign(2);Uncertain significance(2) | B/LB                   | 0.0004747                       | 0.0004873                      |
| 10 | HCN4   | 15:073322861-G>A            | NM_005477.3:c.3232C>T                 | NP_005468.1:p.Arg1078Cys             | missense_variant        | Uncertain Significance | Uncertain significance                               | Uncertain significance | 0.0000209                       | 0.0000185                      |
| 11 | COL5A1 | 9:134805027-G>A             | NM_000093.4:c.3167G>A                 | NP_000084.3:p.Arg1056His             | missense_variant        | Uncertain Significance | Uncertain significance                               | Uncertain significance | 0.0000070                       | 0                              |
| 12 | NOTCH1 | 9:136506827-A>G             | NM_017617.5:c.3790T>C                 | NP_060087.3:p.Cys1264Arg             | missense_variant        | Uncertain Significance | No record                                            | No record              | 0                               | 0                              |
| 13 | FBN1   | 15:048510171-T>C            | NM_000138.4:c.1589-2A>G               |                                      | splice_acceptor_variant | Pathogenic             | No record                                            | No record              | 0                               | 0                              |
| 14 | FBN1   | 15:048508685-T>TA           | NM_000138.4:c.1733dup                 | NP_000129.3:p.Arg579LysfsTer6        | frameshift_variant      | Likely Pathogenic      | No record                                            | No record              | 0                               | 0                              |
|    | MYH11  | 16:015719716-G>C            | NM_002474.3:c.4954-3C>G               |                                      | splice_region_variant   | Uncertain Significance | No record                                            | No record              | 0                               | 0                              |
| 15 | FBN1   | 15:048460289-TTGACTTCCACA>T | NM_000138.4:c.5242_5252del            | NP_000129.3:p.Cys1748LysfsTer15      | frameshift_variant      | Likely Pathogenic      | No record                                            | No record              | 0                               | 0                              |
| 16 | FBN1   | 15:048644615-GC>G           | NM_000138.4:c.156_157delIGC           | NP_000129.3:p.(p.Leu53Ter)           | frameshift_variant      | Likely Pathogenic      | No record                                            | No record              | 0                               | 0                              |
|    | FBN2   | 5:128335984-T>C             | NM_001999.4:c.3724+4A>G               |                                      | splice_region_variant   | Uncertain Significance | No record                                            | No record              | 0                               | 0.0000081                      |
| 17 | NOTCH1 | 9:136508926-C>T             | NM_017617.5:c.3115G>A                 | NP_060087.3:p.Gly1039Ser             | missense_variant        | Benign                 | Benign/Likely benign                                 | B/LB                   | 0                               | 0.0003250                      |
| 18 | FBN1   | 15:048452676-C>T            | NM_000138.4:c.5431G>A                 | NP_000129.3:p.Glu1811Lys             | missense_variant        | Likely Pathogenic      | Likely pathogenic(3);Uncertain significance(1)       | P/LP                   | 0                               | 0.0000041                      |
| 19 | TGFB2  | 1:218437462-C>T             | NM_003238.5:c.1052C>T                 | NP_003229.1:p.Pro351Leu              | missense_variant        | Likely Pathogenic      | Uncertain significance                               | Uncertain significance | 0.0000140                       | 0.0000163                      |
|    | COL5A1 | 9:134699972-C>A             | NM_000093.4:c.341C>A                  | NP_000084.3:p.Ala114Asp              | missense_variant        | Benign                 | Likely benign                                        | B/LB                   | 0.0007395                       | 0.0005728                      |
| 20 | FBN1   | 15:048497380-A>T            | NM_000138.4:c.2179T>A                 | NP_000129.3:p.Cys727Ser              | missense_variant        | Likely Pathogenic      | No record                                            | No record              | 0                               | 0                              |
| 21 | FBN1   | 15:048600181-A>G            | NM_000138.4:c.400T>C                  | NP_000129.3:p.Cys134Arg              | missense_variant        | Pathogenic             | Pathogenic                                           | P/LP                   | 0                               | 0                              |
| 22 | FBN1   | 15:048613009-C>G            | NM_000138.4:c.247+1G>C                |                                      | splice_donor_variant    | Pathogenic             | No record                                            | No record              | 0                               | 0                              |
| 23 | FBN1   | 15:048495519-C>A            | NM_000138.4:c.2489G>T                 | NP_000129.3:p.Cys830Phe              | missense_variant        | Pathogenic             | No record                                            | No record              | 0                               | 0                              |
|    | COL5A2 | 2:189062866-G>A             | NM_000393.5:c.1976C>T                 | NP_000384.2:p.Pro659Leu              | missense_variant        | Benign                 | Likely benign(3);Uncertain significance(2)           | B/LB                   | 0.0003638                       | 0.0004843                      |

|    |        |                                         |                            |                                 |                       |                        |                                                      |                        |           |           |
|----|--------|-----------------------------------------|----------------------------|---------------------------------|-----------------------|------------------------|------------------------------------------------------|------------------------|-----------|-----------|
|    | COL5A2 | 2:189179600-A>G                         | NM_000393.5:c.5T>C         | NP_000384.2:p.Met2Thr           | missense_variant      | Likely Benign          | Uncertain significance                               | Uncertain significance | 0.0000070 | 0.0000437 |
|    | ELN    | 7:074042986-G>A                         | NM_000501.4:c.328G>A       | NP_000492.2:p.Ala110Thr         | missense_variant      | Benign                 | Benign(1);Likely benign(2);Uncertain significance(2) | B/LB                   | 0.0004747 | 0.0004873 |
|    | ELN    | 7:074065732-G>A                         | NM_000501.4:c.2032G>A      | NP_000492.2:p.Gly678Ser         | missense_variant      | Benign                 | Uncertain significance                               | Uncertain significance | 0.0000979 | 0.0000487 |
| 24 | HCN4   | 15:073329702-CACGGGCGCCTGCCG>C          | NM_005477.3:c.1447_1461del | NP_005468.1:p.Arg483_Val487del  | inframe_deletion      | Likely Pathogenic      | No record                                            | No record              | 0         | 0         |
| 25 | FBN1   | 15:048537704-G>A                        | NM_000138.4:c.643C>T       | NP_000129.3:p.Arg215Ter         | stop_gained           | Pathogenic             | Pathogenic                                           | P/LP                   | 0         | 0         |
| 26 | COL5A2 | 2:189043143-T>A                         | NM_000393.5:c.3471+8A>T    |                                 | splice_region_variant | Benign                 | No record                                            | No record              | 0.0006003 | 0.0005271 |
| 27 | TGFB2  | 1:218346889-T>TC                        | NM_003238.5:c.194dup       | NP_003229.1:p.Glu66GlyfsTer68   | frameshift_variant    | Likely Pathogenic      | No record                                            | No record              | 0         | 0         |
|    | COL1A1 | 17:050194815-A>G                        | NM_000088.3:c.1367T>C      | NP_000079.2:p.Val456Ala         | missense_variant      | Uncertain Significance | No record                                            | No record              | 0         | 0         |
| 28 | TGFB3  | 14:075980601-G>A                        | NM_003239.4:c.293C>T       | NP_003230.1:p.Ser98Leu          | missense_variant      | Benign                 | Benign(1);Likely benign(6);Uncertain significance(2) | B/LB                   | 0.0009073 | 0.0007553 |
|    | MYLK   | 3:123708003-T>C                         | NM_053025.3:c.2141A>G      | NP_444253.3:p.Glu714Gly         | missense_variant      | Likely Pathogenic      | No record                                            | No record              | 0.0000140 | 0.0000081 |
|    | TGFB1  | 9:099144800-T>C                         | NM_004612.4:c.1042T>C      | NP_004603.1:p.Cys348Arg         | missense_variant      | Likely Pathogenic      | No record                                            | No record              | 0         | 0         |
| 29 | NOTCH1 | 9:136507350-C>T                         | NM_017617.5:c.3598G>A      | NP_060087.3:p.Asp1200Asn        | missense_variant      | Benign                 | Uncertain significance                               | Uncertain significance | 0.0000140 | 0.0000981 |
| 30 | COL3A1 | 2:188993364-G>T                         | NM_000090.3:c.1054G>T      | NP_000081.1:p.Glu352Ter         | stop_gained           | Pathogenic             | No record                                            | No record              | 0         | 0         |
|    | FBN2   | 5:128263641-G>C                         | NM_001999.4:c.7976C>G      | NP_001990.2:p.Ser2659Cys        | missense_variant      | Uncertain Significance | No record                                            | No record              | 0         | 0         |
| 31 | NOTCH1 | 9:136523752-G>A                         | NM_017617.5:c.368C>T       | NP_060087.3:p.Thr123Met         | missense_variant      | Benign                 | Benign/Likely benign                                 | B/LB                   | 0.0007396 | 0.0009510 |
|    | FBN2   | 5:128376802-T>C                         | NM_001999.4:c.1901A>G      | NP_001990.2:p.Asn634Ser         | missense_variant      | Uncertain Significance | Uncertain significance                               | Uncertain significance | 0         | 0         |
| 32 | NOTCH1 | 9:136507379-T>C                         | NM_017617.5:c.3569A>G      | NP_060087.3:p.His1190Arg        | missense_variant      | Likely Benign          | Uncertain significance                               | Uncertain significance | 0.0000140 | 0.0000083 |
| 33 | COL5A1 | 9:134802904-C>T                         | NM_000093.4:c.3023C>T      | NP_000084.3:p.Thr1008Met        | missense_variant      | Likely Benign          | Likely benign(1);Uncertain significance(3)           | Uncertain significance | 0.0000907 | 0.0000786 |
| 34 | FLNA   | X:154352343-C>T                         | NM_001110556.2:c.6607G>A   | NP_001104026.1:p.Val2203Ile     | missense_variant      | Likely Benign          | Likely benign(1);Uncertain significance(1)           | Uncertain significance | 0         | 0.0000056 |
| 35 | MYH11  | 16:015718337-C>T                        | NM_002474.3:c.5273G>A      | NP_002465.1:p.Arg1758Gln        | missense_variant      | Benign                 | Likely benign(1);Uncertain significance(3)           | Uncertain significance | 0.0001954 | 0.0001566 |
| 36 | TGFB3  | 14:075980601-G>A                        | NM_003239.4:c.293C>T       | NP_003230.1:p.Ser98Leu          | missense_variant      | Benign                 | Benign(1);Likely benign(6);Uncertain significance(2) | B/LB                   | 0.0009073 | 0.0007553 |
|    | MYH11  | 16:015715029-G>A                        | NM_002474.3:c.5666C>T      | NP_002465.1:p.Ala1889Val        | missense_variant      | Benign                 | Uncertain significance                               | Uncertain significance | 0.0000559 | 0.0000488 |
| 37 | FBN1   | 15:048468057-TCTCCTCGAGTTCG>T           | NM_000138.4:c.4615_4627del | NP_000129.3:p.Arg1539ThrfsTer38 | frameshift_variant    | Likely Pathogenic      | No record                                            | No record              | 0         | 0         |
| 38 | MYH11  | 16:015721420-A>C                        | NM_002474.3:c.4578+2T>G    |                                 | splice_donor_variant  | Pathogenic             | No record                                            | No record              | 0         | 0         |
|    | ELN    | 7:074056290-AGTTGGAGGCATTCCTACTTACGGG>A | NM_000501.4:c.1178_1201del | NP_000492.2:p.Gly393_Gly400del  | inframe_deletion      | Benign                 | Likely benign(1);Uncertain significance(2)           | Uncertain significance | 0.0003428 | 0.0003655 |
|    | COL5A1 | 9:134824844-A>G                         | NM_000093.4:c.4943A>G      | NP_000084.3:p.Asp1648Gly        | missense_variant      | Likely Benign          | Uncertain significance                               | Uncertain significance | 0.0000070 | 0.0000336 |
|    | NOTCH1 | 9:136497012-C>T                         | NM_017617.5:c.6727G>A      | NP_060087.3:p.Gly2243Ser        | missense_variant      | Likely Benign          | Uncertain significance                               | Uncertain significance | 0.0000349 | 0.0000331 |
| 39 | MYLK   | 3:123708769-G>A                         | NM_053025.3:c.2069C>T      | NP_444253.3:p.Thr690Met         | missense_variant      | Uncertain Significance | Uncertain significance                               | Uncertain significance | 0.0000070 | 0.0000081 |
|    | COL5A1 | 9:134814873-C>G                         | NM_000093.4:c.3983C>G      | NP_000084.3:p.Pro1328Arg        | missense_variant      | Benign                 | Likely benign(4);Uncertain significance(3)           | B/LB                   | 0.0001814 | 0.0004901 |
| 40 | FBN1   | 15:048495155-G>A                        | NM_000138.4:c.2645C>T      | NP_000129.3:p.Ala882Val         | missense_variant      | Pathogenic             | Pathogenic/Likely pathogenic                         | P/LP                   | 0         | 0         |
| 41 | FBN1   | 15:048508633-A>G                        | NM_000138.4:c.1786T>C      | NP_000129.3:p.Cys596Arg         | missense_variant      | Pathogenic             | No record                                            | No record              | 0         | 0         |

|    |        |                              |                             |                                  |                       |                        |                                                       |                        |           |           |
|----|--------|------------------------------|-----------------------------|----------------------------------|-----------------------|------------------------|-------------------------------------------------------|------------------------|-----------|-----------|
| 42 | COL5A2 | 2:189053905-C>T              | NM_000393.5:c.2489G>A       | NP_000384.2:p.Arg830Gln          | missense_variant      | Likely Benign          | No record                                             | No record              | 0         | 0.0000244 |
|    | COL5A1 | 9:134766461-C>T              | NM_000093.4:c.2096C>T       | NP_000084.3:p.Thr699Met          | missense_variant      | Likely Benign          | Likely benign(6);Uncertain significance(1)            | B/LB                   | 0.0005722 | 0.0006179 |
| 43 | MYH11  | 16:015715004-G>C             | NM_002474.3:c.5691C>G       | NP_002465.1:p.Asn1897Lys         | missense_variant      | Likely Benign          | No record                                             | No record              | 0         | 0         |
|    | NOTCH1 | 9:136513479-CATT>C           | NM_017617.5:c.2263_2265del  | NP_060087.3:p.Asn755del          | inframe_deletion      | Benign                 | Uncertain significance                                | Uncertain significance | 0.0002163 | 0.0002159 |
| 44 | FBN1   | 15:048474645-TG>T            | NM_000138.4:c.3969del       | NP_000129.3:p.Asn1324Met fsTer89 | frameshift_variant    | Likely Pathogenic      | No record                                             | No record              | 0         | 0         |
|    | COL5A1 | 9:134699972-C>A              | NM_000093.4:c.341C>A        | NP_000084.3:p.Ala114Asp          | missense_variant      | Benign                 | Likely benign                                         | B/LB                   | 0.0007395 | 0.0005728 |
| 45 | FBN1   | 15:048487353-G>A             | NM_000138.4:c.3422C>T       | NP_000129.3:p.Pro1141Leu         | missense_variant      | Benign                 | Benign(3);Likely benign(10);Uncertain significance(1) | B/LB                   | 0.0005304 | 0.0008893 |
| 46 | COL5A2 | 2:189062866-G>A              | NM_000393.5:c.1976C>T       | NP_000384.2:p.Pro659Leu          | missense_variant      | Benign                 | Likely benign(3);Uncertain significance(2)            | B/LB                   | 0.0003638 | 0.0004843 |
| 47 | FBN1   | 15:048526254-AT>A            | NM_000138.4:c.863del        | NP_000129.3:p.Asp288Valfs Ter42  | frameshift_variant    | Likely Pathogenic      | No record                                             | No record              | 0         | 0         |
|    | HCN4   | 15:073322516-C>G             | NM_005477.3:c.3577G>C       | NP_005468.1:p.Glu1193Gln         | missense_variant      | Benign                 | Benign(1);Likely benign(2);Uncertain significance(1)  | B/LB                   | 0.0006698 | 0.0007351 |
| 48 | COL5A1 | 9:134753892-G>A              | ENST00000371817.8:c.1762G>A | ENSP00000360882.3:p.Val588Met    | missense_variant      | Likely Benign          | No record                                             | No record              | 0.0000140 | 0.0000041 |
|    | NOTCH1 | 9:136509030-G>A              | NM_017617.5:c.3011C>T       | NP_060087.3:p.Ser1004Leu         | missense_variant      | Benign                 | Likely benign                                         | B/LB                   | 0.0001535 | 0.0001782 |
| 49 | COL5A1 | 9:134753892-G>A              | NM_000093.4:c.1762G>A       | NP_000084.3:p.Val588Met          | missense_variant      | Likely Benign          | No record                                             | No record              | 0.0000140 | 0.0000041 |
| 50 | FBN1   | 15:048489983-C>T             | NM_000138.4:c.2950G>A       | NP_000129.3:p.Val984Ile          | missense_variant      | Likely Pathogenic      | Likely benign(5);Uncertain significance(4)            | B/LB                   | 0.0000279 | 0.0000162 |
| 51 | COL1A1 | 17:050191451-C>T             | NM_000088.3:c.2167G>A       | NP_000079.2:p.Ala723Thr          | missense_variant      | Benign                 | Benign(3);Likely benign(1);Uncertain significance(1)  | B/LB                   | 0.0000838 | 0.0004508 |
| 52 | FBN1   | 15:048520715-CG>C            | NM_000138.4:c.1090del       | NP_000129.3:p.Arg364Aspfs Ter31  | frameshift_variant    | Pathogenic             | Pathogenic                                            | P/LP                   | 0         | 0         |
| 53 | NUP43  | 6:149745973-A>T              | NM_198887.3:c.210T>A        | NP_942590.1:p.Asp70Glu           | missense_variant      | Uncertain Significance | No record                                             | No record              | 0         | 0         |
| 54 | FBN1   | 15:048437803-C>T             | NM_000138.4:c.6278G>A       | NP_000129.3:p.Gly2093Glu         | missense_variant      | Likely Pathogenic      | No record                                             | No record              | 0         | 0         |
| 55 | FBN2   | 5:128276106-G>C              | NM_001999.4:c.7526C>G       | NP_001990.2:p.Thr2509Ser         | missense_variant      | Uncertain Significance | No record                                             | No record              | 0.0000070 | 0         |
|    | FLNA   | X:154349750-C>T              | NM_001110556.2:c.7451G>A    | NP_001104026.1:p.Arg2484 His     | missense_variant      | Likely Benign          | No record                                             | No record              | 0.0000188 | 0.0000056 |
| 56 | FLNA   | X:154348990-G>C              | NM_001110556.2:c.7803C>G    | NP_001104026.1:p.Cys2601 Trp     | missense_variant      | Uncertain Significance | No record                                             | No record              | 0         | 0         |
| 57 | FBN2   | 5:128259681-T>C              | NM_001999.4:c.8513A>G       | NP_001990.2:p.Gln2838Arg         | missense_variant      | Uncertain Significance | Uncertain significance                                | Uncertain significance | 0         | 0.0000122 |
| 58 | MFAP5  | 12:008648056-C>G             | NR_123734.1:n.860G>C        |                                  | splice_region_variant | Likely Benign          | No record                                             | No record              | 0.0000908 | 0.0000672 |
|    | COL1A1 | 17:050185845-T>C             | ENST00000225964.9:c.4181A>G |                                  | missense_variant      | Benign                 | Benign/Likely benign                                  | B/LB                   | 0.0008519 | 0.0007843 |
| 59 | ACTA2  | 10:088948852-C>T             | NM_001320855.1:c.79G>A      | NP_001307784.1:p.Asp27Asn        | missense_variant      | Uncertain Significance | No record                                             | No record              | 0         | 0         |
| 60 | NOTCH1 | 9:136515476-C>T              | NM_017617.5:c.1903+7G>A     |                                  | splice_region_variant | Benign                 | No record                                             | No record              | 0.0001605 | 0.0001039 |
| 61 | MYH11  | 16:015750231-C>A             | NM_022844.2:c.1965G>T       | NP_074035.1:p.Gln655His          | missense_variant      | Uncertain Significance | No record                                             | No record              | 0         | 0         |
|    | TGFBR2 | 3:030672168-G>A              | ENST00000359013.4:c.1060G>A | ENSP00000351905.4:p.Ala354Thr    | missense_variant      | Uncertain Significance | Likely benign(2);Uncertain significance(3)            | Uncertain significance | 0.0000558 | 0.0000977 |
| 62 | FBN1   | 15:048465600-TAGCCGGTTGGAC>T | NM_000138.4:c.4898_4909del  | NP_000129.3:p.Cys1633_Gly1636del | inframe_deletion      | Likely Pathogenic      | No record                                             | No record              | 0         | 0         |
|    | FBN2   | 5:128259727-G>T              | NM_001999.4:c.8467C>A       | NP_001990.2:p.Pro2823Thr         | missense_variant      | Uncertain Significance | No record                                             | No record              | 0.0000070 | 0.0000041 |
| 63 | MYH11  | 16:015756336-G>A             | NM_022844.2:c.1749+5C>T     |                                  | splice_region_variant | Uncertain Significance | No record                                             | No record              | 0         | 0.0000041 |

|    |        |                    |                               |                                |                       |                        |                                                      |                        |           |           |
|----|--------|--------------------|-------------------------------|--------------------------------|-----------------------|------------------------|------------------------------------------------------|------------------------|-----------|-----------|
| 64 | FLNA   | X:154354612-G>A    | NM_001110556.2:c.5313+4C>T    |                                | splice_region_variant | Benign                 | Benign(2);Likely benign(1);Uncertain significance(1) | B/LB                   | 0.0002712 | 0.0002383 |
| 65 | ELN    | 7:074063360-G>A    | ENST00000358929.8:c.2095G>A   | ENSP00000351807.5:p.Ala699Thr  | missense_variant      | Likely Benign          | Likely benign(1);Uncertain significance(2)           | Uncertain significance | 0.0000698 | 0.0000973 |
| 66 | HCN4   | 15:073322516-C>G   | NM_005477.3:c.3577G>C         | NP_005468.1:p.Glu1193Gln       | missense_variant      | Benign                 | Benign(1);Likely benign(2);Uncertain significance(1) | B/LB                   | 0.0006698 | 0.0007351 |
| 67 | FBN1   | 15:048430707-C>T   | NM_000138.4:c.6835G>A         | NP_000129.3:p.Gly2279Arg       | missense_variant      | Likely Pathogenic      | Uncertain significance                               | Uncertain significance | 0.0000070 | 0.0000122 |
|    | FBN1   | 15:048505106-G>A   | NM_000138.4:c.1879C>T         | NP_000129.3:p.Arg627Cys        | missense_variant      | Pathogenic             | Pathogenic                                           | P/LP                   | 0.0000070 | 0         |
| 68 | FBN1   | 15:048427768-G>A   | NM_000138.4:c.7003C>T         | NP_000129.3:p.Arg2335Trp       | missense_variant      | Likely Pathogenic      | Likely pathogenic(2);Uncertain significance(1)       | P/LP                   | 0         | 0         |
| 69 | FBN1   | 15:048456720-C>T   | NM_000138.4:c.5339G>A         | NP_000129.3:p.Gly1780Glu       | missense_variant      | Likely Pathogenic      | No record                                            | No record              | 0         | 0         |
|    | HCN4   | 15:073322516-C>G   | NM_005477.3:c.3577G>C         | NP_005468.1:p.Glu1193Gln       | missense_variant      | Benign                 | enign(1);Likely benign(2);Uncertain significance(1)  | B/LB                   | 0.0006698 | 0.0007351 |
| 70 | ACTA2  | 10:088939508-G>A   | NM_001320855.1:c.807C>T       | NP_001307784.1:p.Ile269%3D     | splice_region_variant | Benign                 | Likely benign                                        | B/LB                   | 0.0000977 | 0.0001303 |
| 71 | ELN    | 7:074063148-C>A    | ENST00000358929.8:c.1973-5C>A |                                | splice_region_variant | Uncertain Significance | No record                                            | No record              | 0         | 0.0000088 |
| 72 | ACTA2  | 10:088941252-C>T   | NM_001320855.1:c.593G>A       | NP_001307784.1:p.Arg198His     | missense_variant      | Uncertain Significance | Likely pathogenic(2);Uncertain significance(1)       | P/LP                   | 0         | 0         |
|    | SMAD3  | 15:067184779-CAG>C | NM_005902.4:c.925_926del      | NP_005893.1:p.Ser309Ter        | frameshift_variant    | Likely Pathogenic      | No record                                            | No record              | 0         | 0         |
|    | HCN4   | 15:073322516-C>G   | NM_005477.3:c.3577G>C         | NP_005468.1:p.Glu1193Gln       | missense_variant      | Benign                 | Benign(1);Likely benign(2);Uncertain significance(1) | B/LB                   | 0.0006698 | 0.0007351 |
|    | COL3A1 | 2:188990144-C>A    | NM_000090.3:c.739C>A          | NP_000081.1:p.Pro247Thr        | missense_variant      | Uncertain Significance | Uncertain significance                               | Uncertain significance | 0         | 0         |
|    | COL5A1 | 9:134824844-A>G    | ENST00000371817.8:c.4943A>G   | ENSP00000360882.3:p.Asp1648Gly | missense_variant      | Likely Benign          | No record                                            | No record              | 0.0000070 | 0.0000336 |
| 73 | FBN1   | 15:048492577-T>G   | NM_000138.4:c.2738A>C         | NP_000129.3:p.Glu913Ala        | missense_variant      | Likely Pathogenic      | Likely pathogenic                                    | P/LP                   | 0         | 0         |

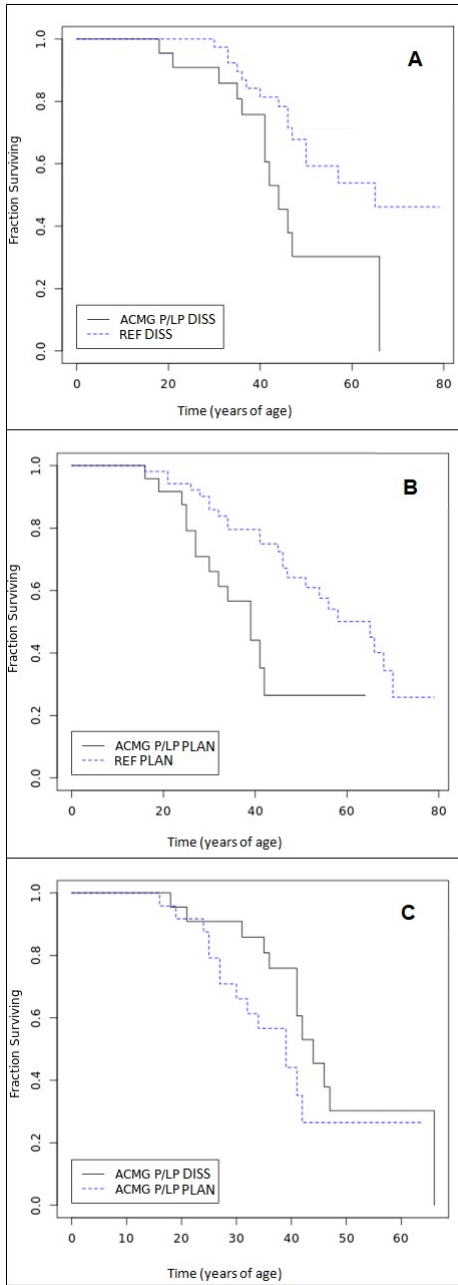

**Figure S1.** Kaplan–Meier analysis of event free survival in TAAD probands with variants classified as: (A) P/LP by ACMG (ACMG P/LP DISS) vs. reference group (REF DISS) – event = dissection prior to surgical intervention, Log-Rank Chi- square 5.23,  $p = 0.022$ ), (B) P/LP by ACMG (ACMG P/LP PLAN) vs. reference group (REF PLAN) – event = planned prophylactic surgery, Log-Rank Chi- square 7.44,  $p = 0.0064$ , (C) P/LP by ACMG (ACMG P/LP DISS) – event = dissection prior to surgical intervention vs. P/LP by ACMG (ACMG P/LP PLAN) - event = planned prophylactic surgery, Log-Rank Chi-square 1.83,  $p = 0.18$ .

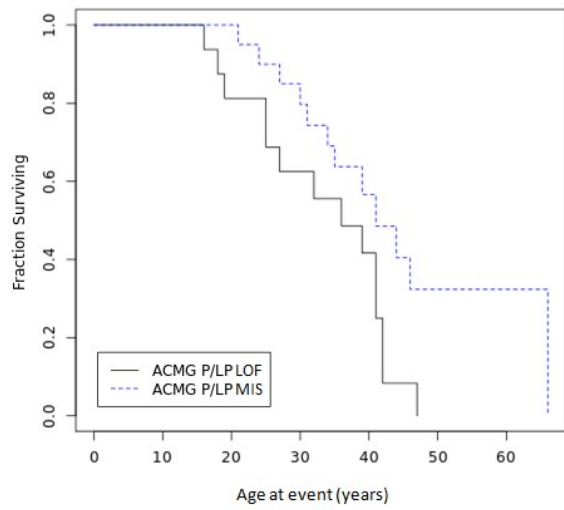

**Figure S2.** Kaplan–Meier analysis of event free survival in TAAD probands with LOF variants classified as P/LP by ACMG (ACMG P/LP LOF) vs. missense and small in-frame deletions (ACMG P/LP MIS), Log-Rank Chi-square 4.16,  $p = 0.041$ .
